# Supplementary material for: Cloning and Function Analysis of the CsTAU1 in Response to Salt–Alkali Stress
Source: MDPI journal article supplement (doi:10.3390/genes15050613), 2024-05-11
Supplement: s1 [file s1]

## Preparation of reagents related to the extraction of Arabidopsis protoplasts

Cellulase hydrolysate (10 mL, PH=5.7)

|                  |         |
|------------------|---------|
| Cellulase R10    | 0.1 g   |
| Mecerozyme R10   | 0.025 g |
| Mannitol (0.8 M) | 5 mL    |
| KCl (1 M)        | 0.2 mL  |
| MES (100 mM)     | 2 mL    |

W5 solution (100 mL, PH=5.7)

|                         |          |
|-------------------------|----------|
| NaCl (5M)               | 3.08 mL  |
| CaCl <sub>2</sub> (1 M) | 12.5 mL  |
| KCl (1 M)               | 0.5 mL   |
| Glucose (10 mM)         | 50 mL    |
| MES (100mM)             | 2 mL     |
| ddH <sub>2</sub> O      | 31.92 mL |

MMg solution (10 mL, PH=5.7)

|                         |         |
|-------------------------|---------|
| Mannitol (0.8 M)        | 5 mL    |
| MgCl <sub>2</sub> (1 M) | 0.15 mL |
| MES (100mM)             | 0.4 mL  |
| ddH <sub>2</sub> O      | 4.45 mL |

40%PEG4000 solution (10 mL)

|                         |        |
|-------------------------|--------|
| Mannitol (0.8 M)        | 2.5 mL |
| PEG4000                 | 4 g    |
| CaCl <sub>2</sub> (1 M) | 1 mL   |
| ddH <sub>2</sub> O      | 3 mL   |

## Extraction of Arabidopsis Protoplasts

- (1) Sow Columbia wild-type Arabidopsis in germination medium and grow in a light incubator for 7 days;
- (2) Transfer Arabidopsis, which sprouts and grows small roots, into a nutrient bowl to continue growing;
- (3) Select Arabidopsis thaliana that has not yet bloomed, cut the healthy leaves into thin strips along the direction of the leaf veins;
- (4) Put the thin strip into the prepared enzymatic solution, and use tweezers to assist in sedimentation. Conduct enzymatic reaction under dark conditions at 25 °C for 4 hours, and the enzymatic solution turns green;
- (5) Filter the above enzymatic hydrolysate using a fine mesh nylon membrane;
- (6) Centrifuge 100g for 3 minutes;
- (7) Gently discard the supernatant to prevent protoplast cell dissection. Slowly add 10ml of W5 solution, wash off the enzyme solution, and centrifuge 100g for 3 minutes;
- (8) Repeat step 4, add 10ml of W5 and ice bath for 30 minutes;
- (9) Microscopic observation of Arabidopsis thaliana protoplasts to determine if their morphology is intact, with round cells and gaps between them.

## 35S-CsTAU1-eGFP Plasmid Transformation of Arabidopsis Protoplasts

- (1) Take 1mL of the prepared Arabidopsis protoplast cells and slowly add them to a 2mL imported centrifuge tube (not easily adhered to the wall). Centrifuge 100 g for 3 minutes;
- (2) Gently discard the supernatant and try to remove it as thoroughly as possible, but do not damage the Arabidopsis protoplast cells;
- (3) add 200  $\mu$ L Resuspend cells in MMG solution, paying attention to cell integrity;
- (4) Join 20  $\mu$ L high concentration plasmid, gently mix well, let stand at 25 °C for 5 minutes
- (5) Add 220  $\mu$ L 40% PEG4000, mix gently and let stand for 15 minutes;
- (6) Add 1mL of pre cooled W5 solution, slowly flip it up and down, mix well, centrifuge 100g for 1-2 minutes, and gently discard the supernatant;
- (7) Repeat step 6;
- (8) Add 500  $\mu$ L mix the pre cooled W5 solution gently and place it flat in a petri dish. Incubate under 25 °C light conditions for more than 16 hours to fully express CsTAU1;
- (9) Using laser confocal microscopy (Leica, Germany) to observe the expression of fusion proteins.
